# Supplementary material for: Clinical diagnostic values of transfer RNA-derived fragment tRF-19-3L7L73JD and its effects on the growth of gastric cancer cells
Source: PubMed Central journal article supplement (PMC8100793; doi:10.7150/jca.51567), 2021-04-02
Supplement: jcav12p3230s1.pdf [file jcav12p3230s1.pdf]

## Supplemental data

Supplemental Table 1. qRT-PCR Primer sequences

| Name            | Sequence                                                                |
|-----------------|-------------------------------------------------------------------------|
| tRF-19-3L7L73JD | F: 5' CCGACGATCCCGTAGTGTAG3'<br>R: 5' TGCTCTCCGATCTGATAACC3'            |
| U6              | F: 5' GCTTCGGCAGCACATATACTAAAAT 3'<br>R: 5' CGCTTCACGAATTTGCGTGTGCAT 3' |

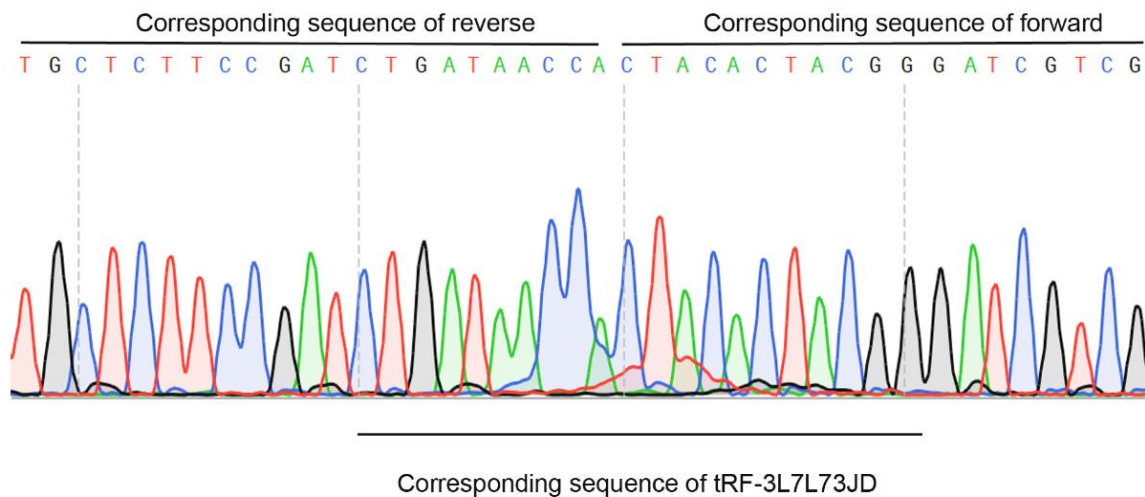

Supplemental Figure 1. Sequencing results of tRF-19-3L7L73JD qRT-PCR products.
